# Supplementary material for: Growth of metal–semiconductor core–multishell nanorods with optimized field confinement and nonlinear enhancement
Source: Royal Society of Chemistry journal article supplement (doi:10.1039/c5nr09151a), 2016-01-01
Supplement: c5nr09151a1.pdf [file c5nr09151a1.pdf]

## Supporting Information

# Growth of Metal-Semiconductor Core-Multishell Nanorods with Optimized Field Confinement and Nonlinear Enhancement

*Fan Nan,<sup>a</sup> Fang-Ming Xie,<sup>b</sup> Shan Liang,<sup>a,c</sup> Liang Ma,<sup>a</sup> Da-Jie Yang,<sup>a</sup> Xiao-Li Liu,<sup>a</sup> Jia-Hong Wang,<sup>a</sup> Zi-Qiang Cheng,<sup>a</sup> Xue-Feng Yu,<sup>a</sup> Li Zhou,<sup>\*a</sup> Qu-Quan Wang<sup>\*a,d</sup> and Jie Zeng<sup>\*e</sup>*

<sup>a</sup>Key Laboratory of Artificial Micro- and Nano-structures of the Ministry of Education and School of Physics and Technology, Wuhan University, Wuhan 430072, P. R. China

<sup>b</sup>School of the Gifted Young, University of Science and Technology of China, Hefei 230026, Anhui, P. R. China

<sup>c</sup>Department of Physics, Hunan Normal University, Changsha 410081, P. R. China

<sup>d</sup>The Institute for Advanced Studies, Wuhan University, Wuhan 430072, P. R. China

<sup>e</sup>Hefei National Laboratory for Physical Sciences at the Microscale, Key Laboratory of Strongly-Coupled Quantum Matter Physics of Chinese Academy of Sciences, Department of Chemical Physics, University of Science and Technology of China, Hefei 230026, Anhui, P. R. China

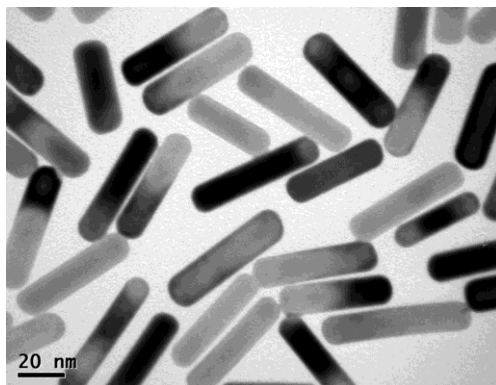

**Figure S1.** TEM image of the Au nanorods.

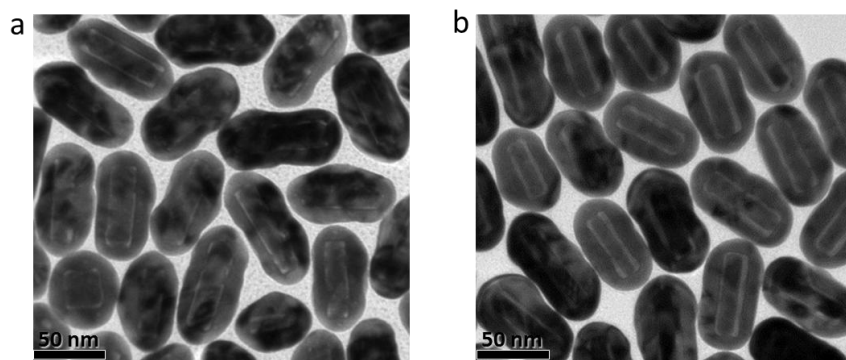

**Figure S2.** TEM images of Au/AuAg NRs with different gaps distances.

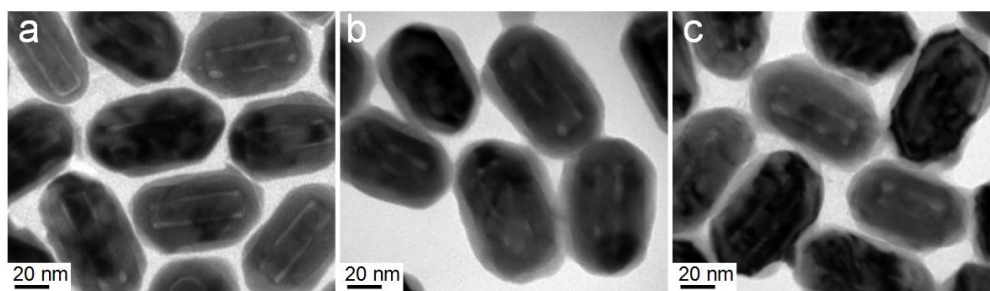

**Figure S3.** TEM images of Au/AuAg/Ag<sub>2</sub>S NRs with different Ag<sub>2</sub>S thicknesses.

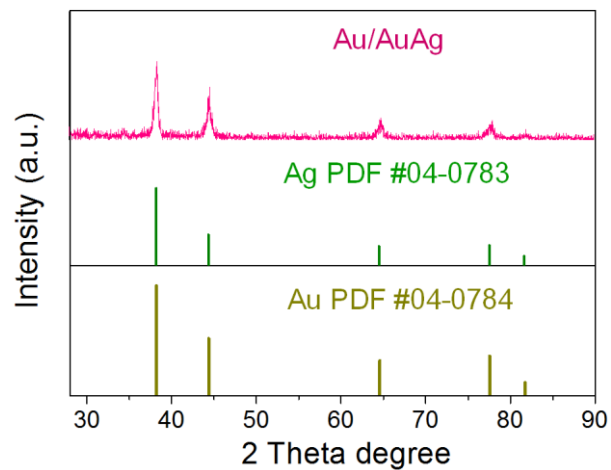

**Figure S4.** XRD patterns of Au/AuAg, Au (PDF #04-0784) and Ag (PDF #04-0783).

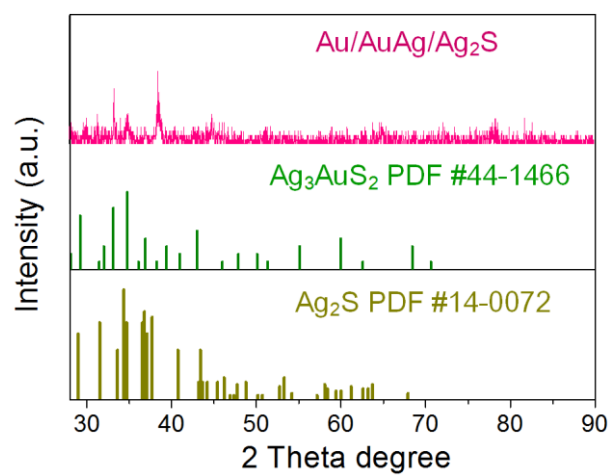

**Figure S5.** XRD pattern of Au/AuAg/Ag<sub>2</sub>S and the standard patterns of Ag<sub>2</sub>S (PDF #14-0072) and Au<sub>3</sub>AuS<sub>2</sub> (PDF #44-1466).

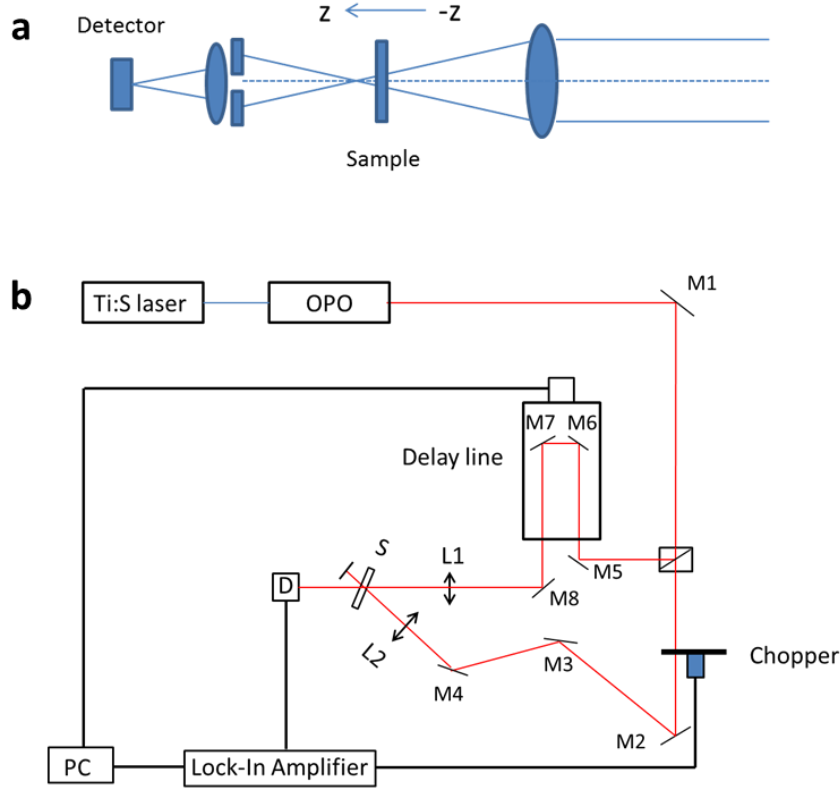

**Figure S6.** Experimental set-up of Z-scan (a) and Pump-probe measurement (b).

The effective NLA coefficient  $\beta_{\text{eff}}$  and the NLR index  $\gamma$  can be calculated by the following relationships:

$$T_{\text{OA}} = \sum_{m=0}^{\infty} \frac{(-q_0)^m}{(1 + z^2/z_0^2)^m (1+m)^{3/2}} \quad (1)$$

$$\frac{T_{\text{CA}}}{T_{\text{OA}}} = 1 + \frac{4\Delta\phi_0 z/z_0}{[(z/z_0)^2 + 9][(z/z_0)^2 + 1]} \quad (2)$$

where  $q_0 = \beta_{\text{eff}} I_0 L_{\text{eff}}$  and  $\Delta\phi_0 = \gamma k I_0 L_{\text{eff}}$ .  $I_0$  is the peak irradiance at the focus ( $z=0$ ).  $L_{\text{eff}}$  is the effective thickness of the samples,  $k=2\pi/\lambda$  is the wave vector of the laser radiation,  $z_0$  is the Rayleigh length of the Gaussian incident beam.
